# Supplementary material for: Coordinate genomic association of transcription factors controlled by an imported quorum sensing peptide in Cryptococcus neoformans
Source: PLoS Genet. 2020 Sep 21;16(9):e1008744. doi: 10.1371/journal.pgen.1008744 (PMC7537855; doi:10.1371/journal.pgen.1008744)
Supplement: S7 Table — Bound genes in each sample were determined by k-means analysis. (XLSX) [file pgen.1008744.s014.xlsx]

## Sheet: SuppTable2. ChIP-seq Replicates
Sample name	anti-FLAG chromatin IP	Genetic background	Optical Density of culture	# of genes bound in Replicate 1	# of genes bound in Replicate 2	Overlap (Bound gene set used in analysis)
C (13)	Cqs2-2xFLAG	WT	1	541	568	525
qC (13)	Cqs2-2xFLAG	qsp1∆	1	823	743	709
L (13)	Liv3-2xFLAG	WT	1	383	353	328
qL (13)	Liv3-2xFLAG	qsp1∆	1	359	326	324
N (14)	3xFLAG-Nrg1	WT	1	512	497	480
qN (14)	3xFLAG-Nrg1	qsp1∆	1	467	487	426
cN (14)	3xFLAG-Nrg1	cqs2∆	1	709	5306	709
C (14)	Cqs2-2xFLAG	WT	1	340	356	337
nC (14)	Cqs2-2xFLAG	nrg1∆	1	422	404	401
L (14)	Liv3-2xFLAG	WT	1	374	382	371
nL (14)	Liv3-2xFLAG	nrg1∆	1	253	251	249
cL (14)	Liv3-2xFLAG	cqs2∆	1	391	253	236
